# Supplementary material for: Modulation and Characterization of Wax-Based Olive Oil Organogels in View of Their Application in the Food Industry
Source: PubMed Central journal article supplement (PMC7931099; doi:10.3390/gels7010012), 2021-01-28
Supplement: gels-07-00012-s001.pdf [file gels-07-00012-s001.pdf]

## Supplementary Materials

# Modulation and Characterization of Wax-Based Olive Oil Organogels in View of Their Application in the Food Industry

Pedro M. Silva <sup>1,2</sup>, Artur J. Martins <sup>2</sup>, Luiz H. Fasolin <sup>3</sup> and António A. Vicente <sup>1,\*</sup>

<sup>1</sup> Centre of Biological Engineering, University of Minho, Campus de Gualtar, 4710-057 Braga, Portugal; pedro.silva@ceb.uminho.pt

<sup>2</sup> Food Processing and Nutrition Group, International Iberian Nanotechnology Laboratory, Av. Mestre José Veiga s/n, 4715-330 Braga, Portugal; artur.martins@inl.int

<sup>3</sup> Department of Food Engineering, School of Food Engineering, University of Campinas—UNICAMP, 13083-862 Campinas, SP, Brazil; lfasolin@unicamp.br

\* Correspondence: avicente@deb.uminho.pt

**Table S1.** Static yield stress of all organogel samples. Different small letters indicate statistically significant differences between different concentrations within the same organogelator, while different capital letters indicate statistically significant differences between different organogels ( $p < 0.05$ ).

| Sample | Yield Stress (Pa)               |
|--------|---------------------------------|
| BO1    | 5.1 ± 1.92 <sup>aA</sup>        |
| BO2    | 28.58 ± 0.43 <sup>aA</sup>      |
| BO3    | 91.3 ± 31.91 <sup>aA</sup>      |
| BO4    | 221.09 ± 72.97 <sup>abA</sup>   |
| BO5    | 545.59 ± 280.23 <sup>bcA</sup>  |
| BO6    | 803.56 ± 166.05 <sup>cA</sup>   |
| CO1    | 3.77 ± 0.7 <sup>aA</sup>        |
| CO2    | 35.25 ± 21.51 <sup>aA</sup>     |
| CO3    | 418.65 ± 102.2 <sup>abB</sup>   |
| CO4    | 832.09 ± 513.32 <sup>abA</sup>  |
| CO5    | 1395.57 ± 369.35 <sup>abB</sup> |
| CO6    | 1824.94 ± 1081.63 <sup>bA</sup> |
| CTO1   | 0.07 ± 0.03 <sup>ab</sup>       |
| CTO2   | 9.95 ± 0.69 <sup>abA</sup>      |
| CTO3   | 30.28 ± 8.16 <sup>abA</sup>     |
| CTO4   | 94.84 ± 7.33 <sup>abA</sup>     |
| CTO5   | 218.73 ± 73.88 <sup>abA</sup>   |
| CTO6   | 409.33 ± 353.72 <sup>bA</sup>   |

**Table S2** Thermal properties of organogels (temperature of melting— $T_m$ ; enthalpy of melting— $\Delta H_m$ ; temperature of crystallization— $T_c$ ; enthalpy of crystallization— $\Delta H_c$ ; entropy of crystallization— $\Delta S_c$ ; sol-gel temperature transition during the melting— $T_{g, \text{melting}}$ ; sol-gel temperature transition during the cooling— $T_{g, \text{cooling}}$ )

| Sample       | Onset<br>$T_{m1}$ (°C) | $T_{m1}$ (°C) | Endset<br>$T_{m1}$ (°C) | $\Delta H_{m1}$<br>(J/g) | Onset<br>$T_{c1}$ (°C) | $T_{c1}$ (°C) | Endset<br>$T_{c1}$ (°C) | $\Delta H_{c1}$<br>(J/g) | $\Delta S_{c1}$<br>(J/g) | Onset<br>$T_{m2}$ (°C) | $T_{m2}$ (°C) | Endset<br>$T_{m2}$ (°C) | $\Delta H_{m2}$<br>(J/g) | Onset<br>$T_{c2}$ (°C) | $T_{c2}$ (°C) | Endset<br>$T_{c2}$ (°C) |
|--------------|------------------------|---------------|-------------------------|--------------------------|------------------------|---------------|-------------------------|--------------------------|--------------------------|------------------------|---------------|-------------------------|--------------------------|------------------------|---------------|-------------------------|
| BO1          | 21.47                  | 25.64         | 25.64                   | 0.04                     | 30.57                  | 28.03         | 23.80                   | -0.49                    | -0.02                    | 32.93                  | 42.64         | 49.64                   | 0.65                     | N.D.                   | N.D.          | N.D.                    |
| BO2          | 22.73                  | 25.07         | 25.07                   | 0.02                     | 36.68                  | 32.59         | 30.97                   | -1.21                    | -0.04                    | 34.65                  | 46.29         | 53.27                   | 1.80                     | 23.47                  | 18.49         | 9.75                    |
| BO3          | 15.84                  | 19.73         | 24.01                   | 0.05                     | 39.86                  | 36.77         | 31.69                   | -1.86                    | -0.05                    | 28.45                  | 27.01         | 28.29                   | 0.24                     | 26.70                  | 22.39         | 14.16                   |
| BO4          | 13.84                  | 18.12         | 23.56                   | 0.07                     | 41.85                  | 39.05         | 34.17                   | -2.30                    | -0.06                    | 24.28                  | 27.84         | 31.13                   | 0.20                     | 28.48                  | 24.38         | 15.58                   |
| BO5          | 15.05                  | 20.22         | 22.22                   | 0.14                     | 42.84                  | 40.62         | 36.75                   | -3.06                    | -0.08                    | 27.59                  | 30.11         | 31.64                   | 0.33                     | 29.79                  | 26.11         | 18.26                   |
| BO6          | 16.72                  | 22.94         | 26.36                   | 0.13                     | 44.37                  | 41.95         | 38.15                   | -3.67                    | -0.09                    | 29.01                  | 30.28         | 31.96                   | 0.25                     | 30.87                  | 26.94         | 19.36                   |
| CO1          | 21.93                  | 25.14         | 27.40                   | 0.04                     | 28.49                  | 26.68         | 24.57                   | -0.10                    | 0.00                     | 33.98                  | 39.98         | 43.91                   | 0.22                     | 23.50                  | 19.96         | 12.90                   |
| CO2          | 21.11                  | 25.77         | 28.00                   | 0.09                     | 34.08                  | 32.09         | 30.09                   | -0.26                    | -0.01                    | 30.50                  | 32.17         | 34.01                   | 0.13                     | 29.39                  | 26.01         | 19.15                   |
| CO3          | 19.99                  | 26.18         | 28.97                   | 0.26                     | 36.73                  | 35.88         | 34.09                   | -0.59                    | -0.02                    | 31.02                  | 34.26         | 36.06                   | 0.33                     | 33.41                  | 30.66         | 24.31                   |
| CO4          | 19.93                  | 26.42         | 29.54                   | 0.29                     | 39.16                  | 37.93         | 36.49                   | -0.71                    | -0.02                    | 32.80                  | 43.42         | 50.32                   | 3.93                     | 35.84                  | 32.88         | 29.67                   |
| CO5          | 21.65                  | 25.26         | 27.54                   | 0.07                     | 40.64                  | 39.35         | 37.95                   | -0.76                    | -0.02                    | 36.66                  | 44.14         | 51.74                   | 4.82                     | 37.41                  | 34.63         | 29.57                   |
| CO6          | 22.18                  | 25.40         | 28.45                   | 0.13                     | 41.26                  | 40.15         | 38.77                   | -1.21                    | -0.03                    | 33.33                  | 44.34         | 50.20                   | 6.02                     | 38.20                  | 35.49         | 30.39                   |
| CTO1         | 37.18                  | 43.33         | 48.08                   | 0.07                     | 44.63                  | 42.06         | 38.74                   | -1.07                    | -0.03                    | 65.10                  | 70.82         | 76.91                   | 0.95                     | 23.22                  | 19.23         | 12.44                   |
| CTO2         | 39.68                  | 46.31         | 50.06                   | 0.09                     | 45.93                  | 42.52         | 36.78                   | -1.01                    | -0.02                    | 66.10                  | 72.09         | 78.23                   | 1.01                     | 24.65                  | 20.02         | 12.76                   |
| CTO3         | 41.40                  | 49.81         | 53.89                   | 0.20                     | 50.13                  | 47.58         | 42.92                   | -2.60                    | -0.05                    | 67.84                  | 73.64         | 80.22                   | 2.41                     | 30.24                  | 26.08         | 19.16                   |
| CTO4         | 42.56                  | 50.79         | 55.14                   | 0.49                     | 53.90                  | 50.32         | 43.80                   | -4.78                    | -0.10                    | 68.98                  | 74.73         | 80.89                   | 4.71                     | 34.94                  | 30.81         | 22.32                   |
| CTO5         | 44.08                  | 52.24         | 56.06                   | 0.64                     | 58.37                  | 54.81         | 50.36                   | -6.15                    | -0.11                    | 69.17                  | 75.28         | 81.23                   | 8.26                     | 49.18                  | 47.29         | 45.35                   |
| CTO6         | 45.26                  | 52.62         | 57.31                   | 0.47                     | 58.24                  | 54.49         | 48.75                   | -5.94                    | -0.11                    | 70.13                  | 76.72         | 81.35                   | 8.96                     | 48.27                  | 45.99         | 43.08                   |
| Control BW   | 63.22                  | 67.80         | 69.84                   | 140.83                   | 60.60                  | 58.51         | 50.80                   | -85.52                   | -1.46                    | N.D.                   | N.D.          | N.D.                    | N.D.                     | 50.22                  | 48.36         | 45.00                   |
| Control CW   | 68.07                  | 73.67         | 76.55                   | 116.52                   | 68.93                  | 66.59         | 63.84                   | -7.02                    | -0.11                    | N.D.                   | N.D.          | N.D.                    | N.D.                     | 62.82                  | 60.03         | 56.33                   |
| Control CT1W | 52.58                  | 59.37         | 63.37                   | N.D.                     | 78.87                  | 75.96         | 71.31                   | -84.84                   | -1.12                    | 82.30                  | 85.39         | 88.03                   | 125.44                   | 70.69                  | 68.65         | 64.28                   |

**Table S2 (continuation)** Thermal properties of organogels (temperature of melting— $T_m$ ; enthalpy of melting— $\Delta H_m$ ; temperature of crystallization— $T_c$ ; enthalpy of crystallization— $\Delta H_c$ ; entropy of crystallization— $\Delta S_c$ ; sol–gel temperature transition during the melting— $T_{g,melting}$ ; sol–gel temperature transition during the cooling— $T_{g,cooling}$ )

| Sample       | $\Delta H_{c2}$<br>(J/g) | $\Delta S_{c2}$<br>(J/g) | Onset<br>$T_{m3}$ (°C) | $T_{m3}$ (°C) | Endset<br>$T_{m3}$ (°C) | $\Delta H_{m3}$<br>(J/g) | Onset<br>$T_{c3}$ (°C) | $T_{c3}$ (°C) | Endset<br>$T_{c3}$ (°C) | $\Delta H_{c3}$<br>(J/g) | $\Delta S_{c3}$<br>(J/g) | $T_{g1}$<br>Melting | $T_{g2}$<br>Melting | $T_{g3}$<br>Melting | $T_{g4}$<br>Melting | $T_{g1}$<br>Cooling | $T_{g2}$<br>Cooling |
|--------------|--------------------------|--------------------------|------------------------|---------------|-------------------------|--------------------------|------------------------|---------------|-------------------------|--------------------------|--------------------------|---------------------|---------------------|---------------------|---------------------|---------------------|---------------------|
| BO1          | N.D.                     | N.D.                     | N.D.                   | N.D.          | N.D.                    | N.D.                     | N.D.                   | N.D.          | N.D.                    | N.D.                     | N.D.                     | 41.21               | 23.28               | N.D.                | N.D.                | 21.01               | N.D.                |
| BO2          | -0.51                    | -0.03                    | N.D.                   | N.D.          | N.D.                    | N.D.                     | N.D.                   | N.D.          | N.D.                    | N.D.                     | N.D.                     | 43.88               | 16.74               | N.D.                | N.D.                | 29.56               | 14.43               |
| BO3          | -1.13                    | -0.05                    | 39.33                  | 48.61         | 54.80                   | 4.32                     | N.D.                   | N.D.          | N.D.                    | N.D.                     | N.D.                     | 41.21               | 22.68               | N.D.                | N.D.                | 21.01               | N.D.                |
| BO4          | -1.44                    | -0.06                    | 36.50                  | 49.67         | 55.76                   | 4.46                     | N.D.                   | N.D.          | N.D.                    | N.D.                     | N.D.                     | 50.27               | 23.29               | N.D.                | N.D.                | 36.62               | 21.76               |
| BO5          | -2.16                    | -0.08                    | 38.56                  | 51.05         | 49.88                   | 6.72                     | N.D.                   | N.D.          | N.D.                    | N.D.                     | N.D.                     | 50.33               | 32.31               | N.D.                | N.D.                | 39.17               | 24.87               |
| BO6          | -2.71                    | -0.10                    | 39.96                  | 51.88         | 56.94                   | 7.04                     | N.D.                   | N.D.          | N.D.                    | N.D.                     | N.D.                     | 50.85               | 30.49               | N.D.                | N.D.                | 40.63               | 26.02               |
| CO1          | -0.29                    | -0.01                    | 51.00                  | 57.86         | 61.76                   | 0.12                     | N.D.                   | N.D.          | N.D.                    | N.D.                     | N.D.                     | 33.35               | 18.80               | N.D.                | N.D.                | 20.73               | 9.91                |
| CO2          | -0.93                    | -0.04                    | 35.23                  | 41.83         | 50.26                   | 1.62                     | N.D.                   | N.D.          | N.D.                    | N.D.                     | N.D.                     | 49.95               | 19.67               | N.D.                | N.D.                | 28.41               | 10.28               |
| CO3          | -2.21                    | -0.07                    | 36.71                  | 42.34         | 50.29                   | 4.01                     | N.D.                   | N.D.          | N.D.                    | N.D.                     | N.D.                     | 55.58               | 32.31               | N.D.                | N.D.                | 32.06               | 11.02               |
| CO4          | -2.94                    | -0.09                    | 58.77                  | 62.26         | 67.07                   | 1.57                     | N.D.                   | N.D.          | N.D.                    | N.D.                     | N.D.                     | 59.94               | 46.66               | N.D.                | N.D.                | 35.93               | 10.46               |
| CO5          | -3.16                    | -0.09                    | 58.78                  | 63.64         | 68.22                   | 2.23                     | N.D.                   | N.D.          | N.D.                    | N.D.                     | N.D.                     | 64.08               | 47.86               | N.D.                | N.D.                | 38.16               | 11.69               |
| CO6          | -5.15                    | -0.15                    | 56.27                  | 62.12         | 69.13                   | 3.69                     | N.D.                   | N.D.          | N.D.                    | N.D.                     | N.D.                     | 64.47               | 48.87               | N.D.                | N.D.                | 39.40               | 12.93               |
| CTO1         | -0.09                    | 0.00                     | N.D.                   | N.D.          | N.D.                    | N.D.                     | N.D.                   | N.D.          | N.D.                    | N.D.                     | N.D.                     | 78.37               | 62.67               | 38.95               | 23.25               | 43.44               | N.D.                |
| CTO2         | -0.12                    | -0.01                    | N.D.                   | N.D.          | N.D.                    | N.D.                     | N.D.                   | N.D.          | N.D.                    | N.D.                     | N.D.                     | 77.71               | 63.88               | 46.07               | 20.78               | 46.79               | N.D.                |
| CTO3         | -0.30                    | -0.01                    | N.D.                   | N.D.          | N.D.                    | N.D.                     | N.D.                   | N.D.          | N.D.                    | N.D.                     | N.D.                     | 78.74               | 66.39               | 44.30               | 23.58               | 50.47               | 39.98               |
| CTO4         | -0.44                    | -0.01                    | N.D.                   | N.D.          | N.D.                    | N.D.                     | N.D.                   | N.D.          | N.D.                    | N.D.                     | N.D.                     | 73.68               | 48.16               | N.D.                | N.D.                | 52.40               | 34.50               |
| CTO5         | -2.38                    | -0.05                    | N.D.                   | N.D.          | N.D.                    | N.D.                     | 38.97                  | 36.12         | 29.64                   | -0.72                    | -0.02                    | 77.43               | 48.43               | N.D.                | N.D.                | 48.31               | 39.25               |
| CTO6         | -2.47                    | -0.05                    | N.D.                   | N.D.          | N.D.                    | N.D.                     | 37.82                  | 34.43         | 28.68                   | -0.64                    | -0.02                    | 78.40               | 48.32               | N.D.                | N.D.                | 62.76               | 50.47               |
| Control BW   | -56.45                   | -1.17                    | N.D.                   | N.D.          | N.D.                    | N.D.                     | N.D.                   | N.D.          | N.D.                    | N.D.                     | N.D.                     |                     |                     |                     |                     |                     |                     |
| Control CW   | -68.60                   | -1.14                    | N.D.                   | N.D.          | N.D.                    | N.D.                     | 55.01                  | 53.44         | 51.14                   | -37.80                   | -0.71                    |                     |                     |                     |                     |                     |                     |
| Control CT1W | -52.67                   | -0.77                    | N.D.                   | N.D.          | N.D.                    | N.D.                     | N.D.                   | N.D.          | N.D.                    | N.D.                     | N.D.                     |                     |                     |                     |                     |                     |                     |

**Table S3** Comparison of melting and crystallization temperatures obtained in DSC and rheological analysis

| <b>Sample</b> | <b>Tm1 (°C)</b> | <b>Tg1 Melting (°C)</b> | <b>Tm2 (°C)</b> | <b>Tg2 Melting (°C)</b> | <b>Tc1 (°C)</b> | <b>Tg1 Cooling (°C)</b> | <b>Tc2 (°C)</b> | <b>Tg2 Cooling (°C)</b> |
|---------------|-----------------|-------------------------|-----------------|-------------------------|-----------------|-------------------------|-----------------|-------------------------|
| BO1 to BO6    | 18.12 to 25.64  | 16.74 to 32.31          | 42.64 to 51.88  | 41.21 to 50.85          | 23.47 to 30.87  | 14.43 to 26.02          | 28.03 to 41.85  | 21.01 to 40.63          |
| CO1 to CO6    | 39.98 to 44.34  | 18.80 to 48.87          | 57.86 to 62.12  | 33.35 to 64.47          | 19.96 to 35.49  | 9.91 to 12.93           | 26.68 to 40.15  | 20.73 to 39.40          |
| CTO1 to CTO6  | 43.33 to 52.72  | 38.95 to 48.43          | 70.82 to 76.72  | 73.68 to 78.74          | 19.23 to 47.29  | 39.98 to 50.47          | 42.06 to 54.49  | 43.44 to 62.76          |
